# Supplementary material
Source: PubMed Central journal article supplement (PMC9133127)

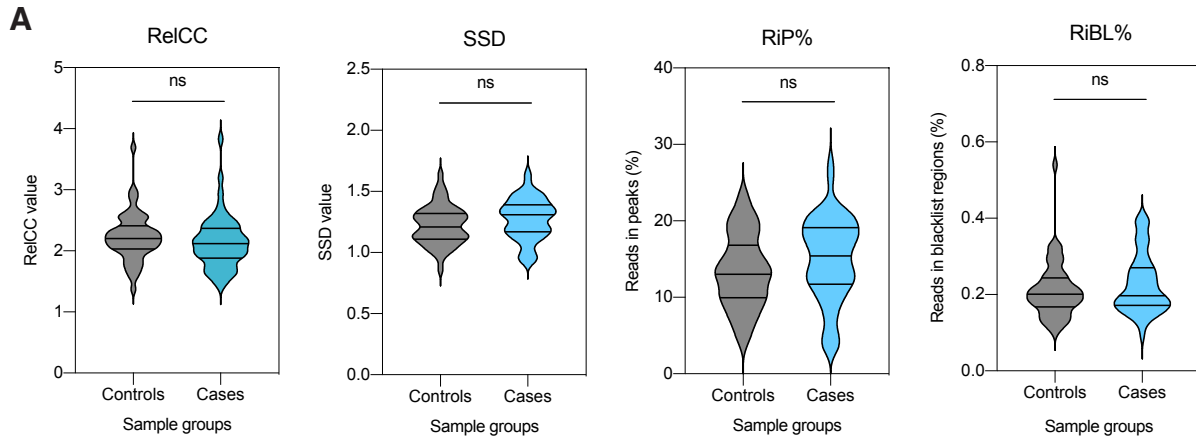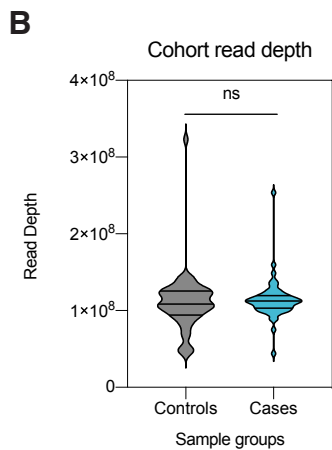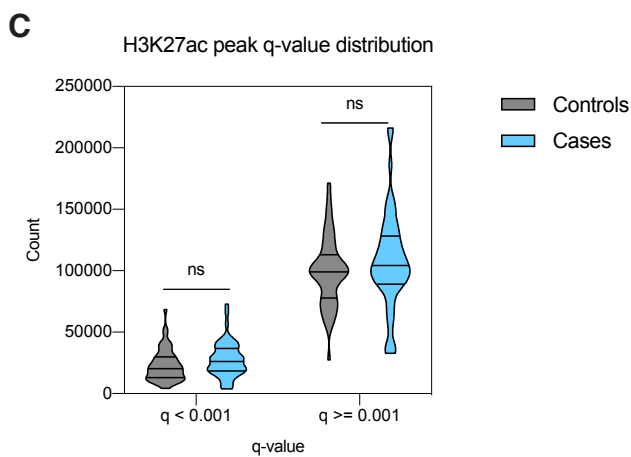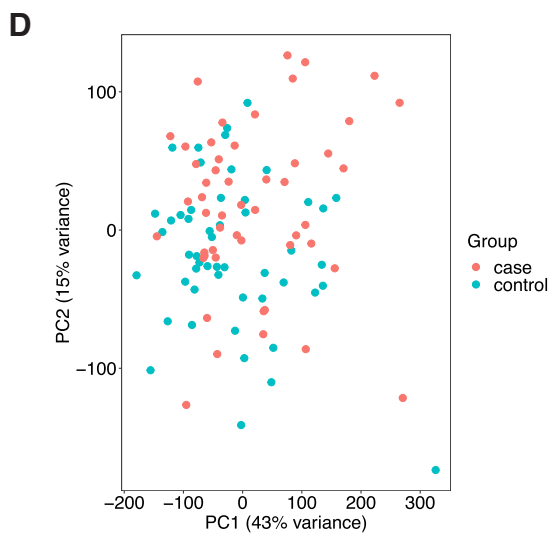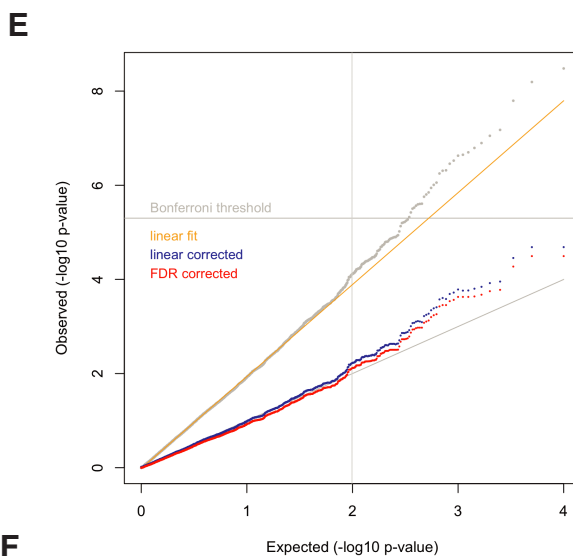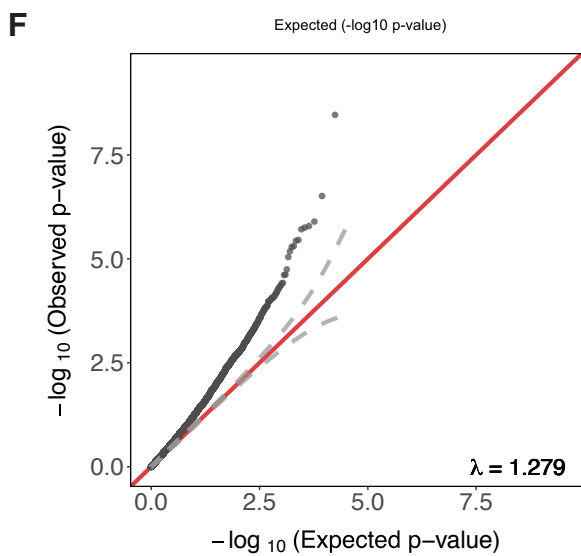

Supplement: NIHMS1778910-supplement-Figure_S1.pdf [file NIHMS1778910-supplement-Figure_S1.pdf]

Supplemental Figure 2: 108 machine learning models description

**A**

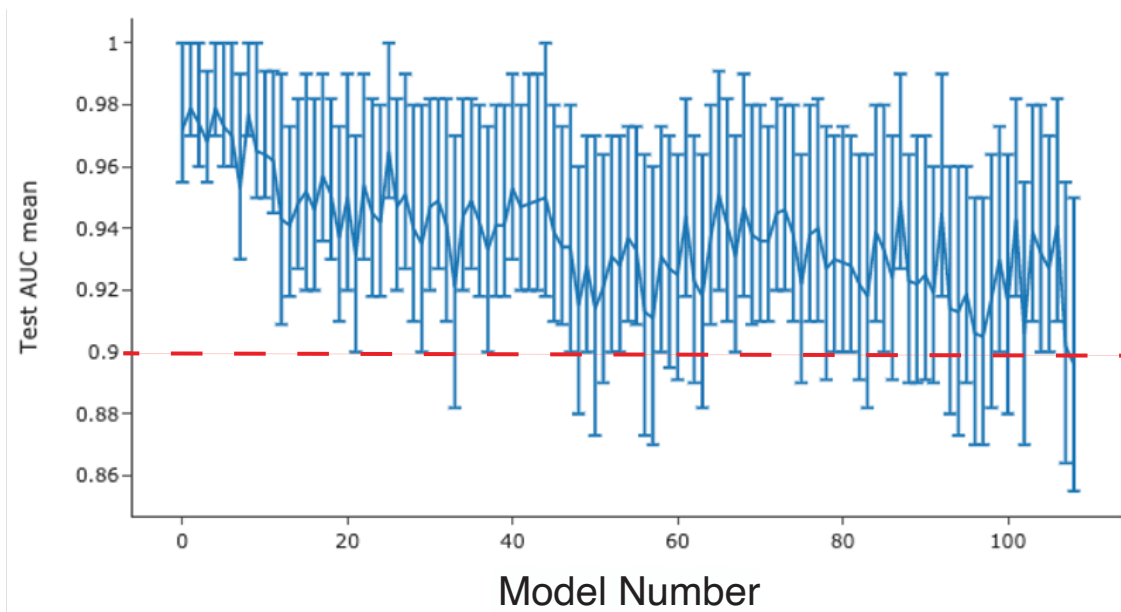

**B**

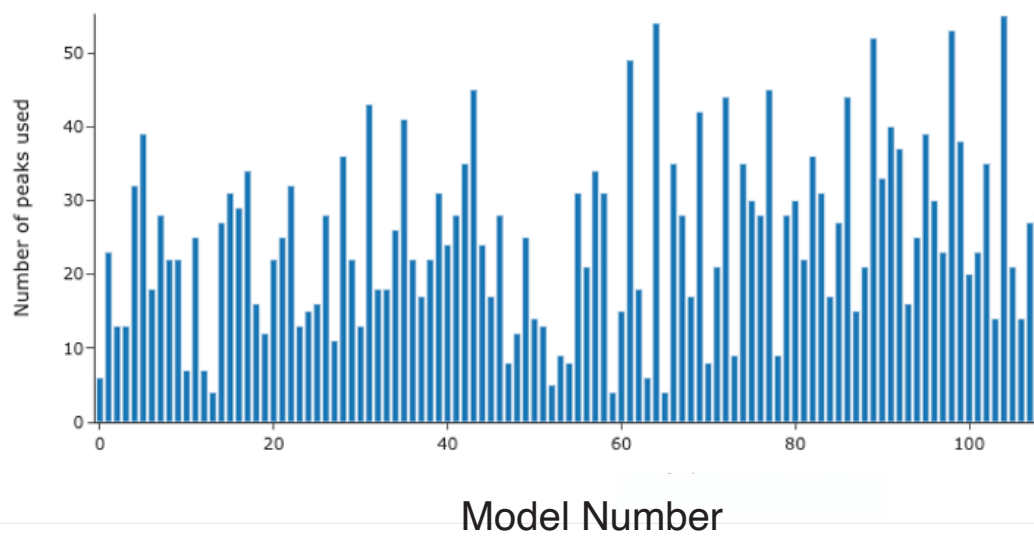

Supplement: NIHMS1778910-supplement-Figure_S2.pdf [file NIHMS1778910-supplement-Figure_S2.pdf]

Supplemental Figure 3: VEL counts and Gained VEL convergence

**A**

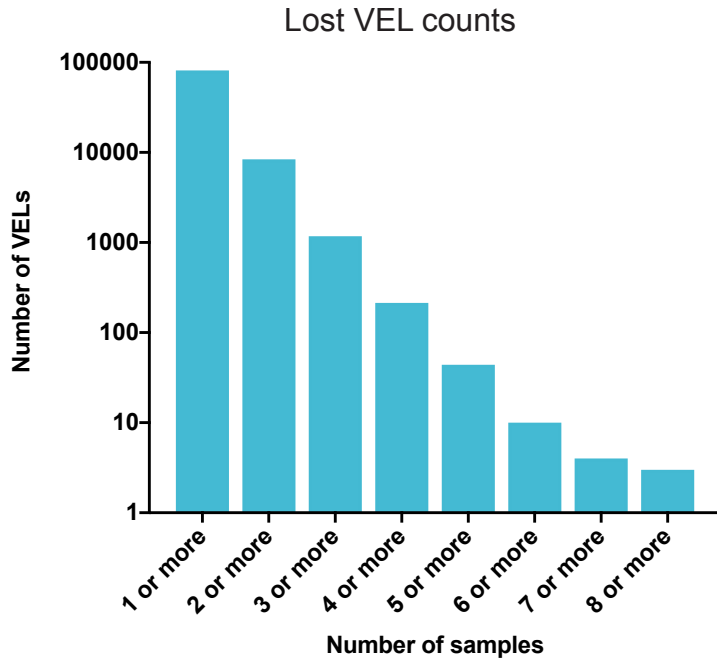

**B**

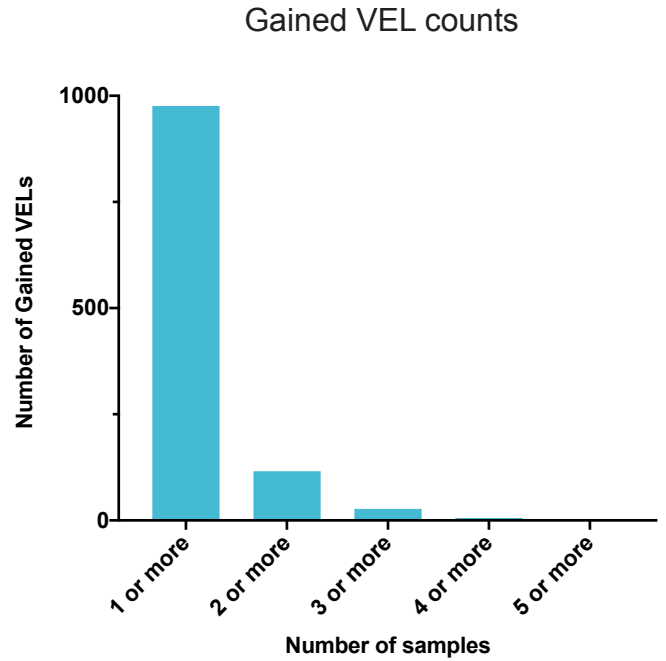

**C**

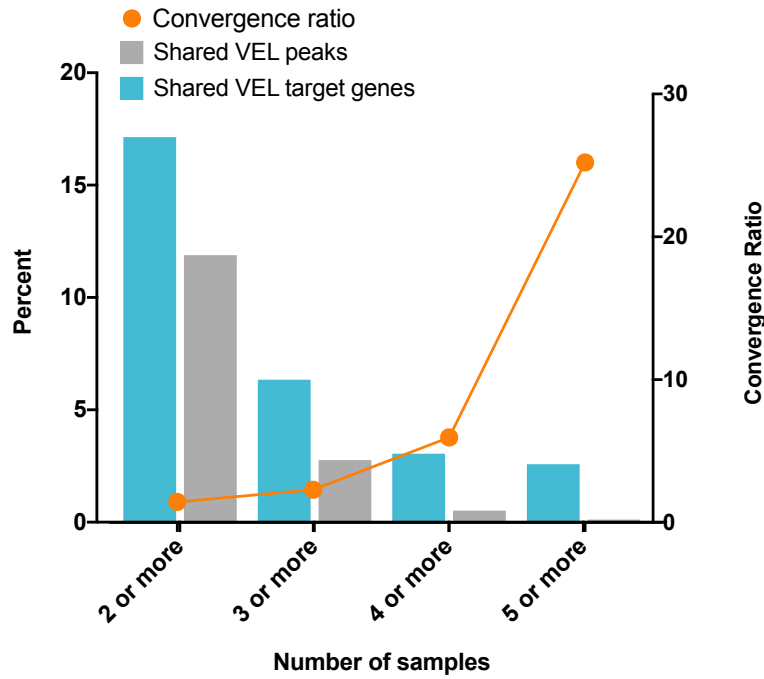

Supplement: NIHMS1778910-supplement-Figure_S3.pdf [file NIHMS1778910-supplement-Figure_S3.pdf]

Supplemental Figure 4: Heritability enrichment in all lost VELs

A

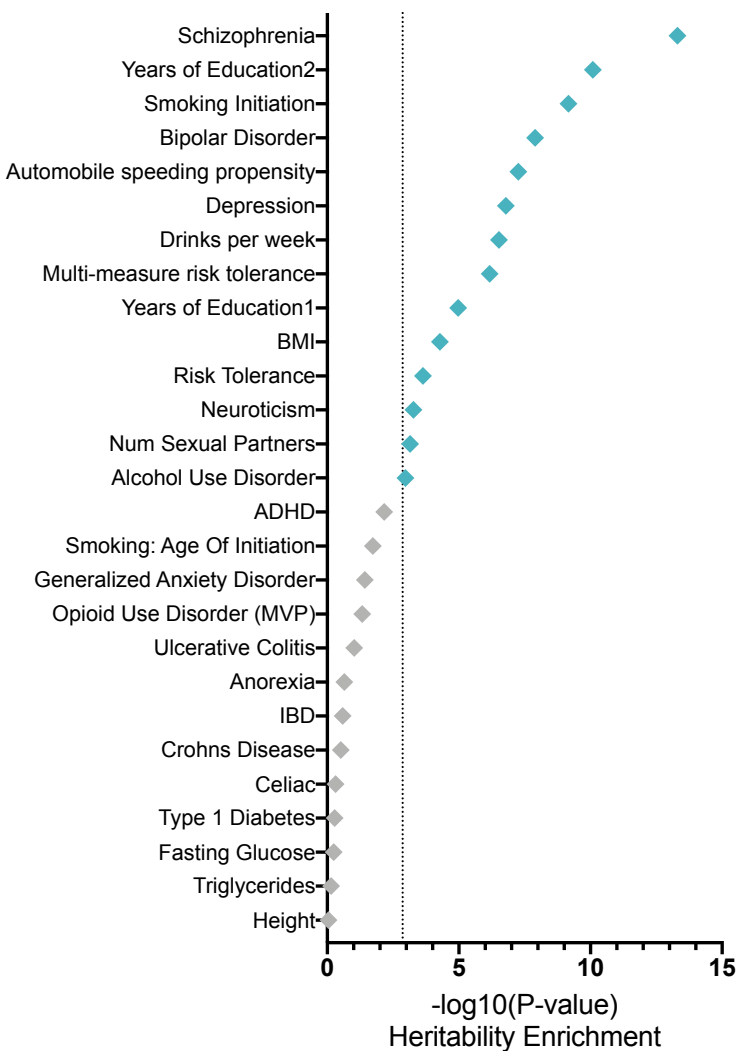

B

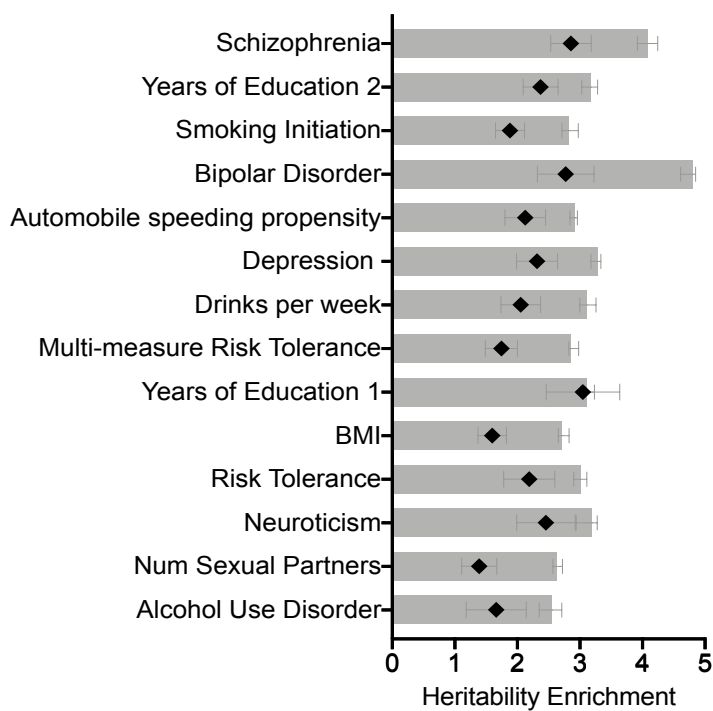

Supplement: NIHMS1778910-supplement-Figure_S4.pdf [file NIHMS1778910-supplement-Figure_S4.pdf]
